# Supplementary material
Source: PubMed Central journal article supplement (PMC6579744)
Supplement: supplement_material_djy155.pdf [file supplement_material_djy155.pdf]

**Supplementary Table 1: Kegg\_Maturity Onset Diabetes of the Young (MODY) and Reactome\_Regulation of Beta Cell Development**

| SNP*        | Gene         | Chr | Position  | Ref Allele | Risk Allele | OR   | 95% CI<br>Lower | 95% CI<br>Upper | P-value† |
|-------------|--------------|-----|-----------|------------|-------------|------|-----------------|-----------------|----------|
| rs1169296   | <i>HNF1A</i> | 12  | 121428407 | A          | G           | 1.12 | 1.07            | 1.17            | 2.63E-07 |
| rs2244608   | <i>HNF1A</i> | 12  | 121416988 | A          | G           | 1.11 | 1.07            | 1.16            | 1.54E-06 |
| rs12951345  | <i>HNF1B</i> | 17  | 36077863  | A          | C           | 0.88 | 0.84            | 0.93            | 1.38E-06 |
| rs7223387   | <i>HNF1B</i> | 17  | 36082473  | T          | G           | 0.89 | 0.85            | 0.94            | 3.46E-06 |
| rs1853150   | <i>HNF4A</i> | 20  | 43081164  | G          | T           | 1.10 | 1.05            | 1.15            | 1.64E-05 |
| rs1913641   | <i>HNF4G</i> | 8   | 76483239  | T          | G           | 1.10 | 1.05            | 1.14            | 1.55E-05 |
| rs2943547   | <i>HNF4G</i> | 8   | 76451098  | A          | G           | 1.09 | 1.05            | 1.14            | 2.31E-05 |
| rs118117270 | <i>PAX4</i>  | 7   | 127263589 | T          | C           | 0.67 | 0.54            | 0.84            | 4.23E-04 |
| rs62483175  | <i>PAX4</i>  | 7   | 127247114 | C          | T           | 0.78 | 0.67            | 0.91            | 0.002    |

\*SNPs contributing to the association of the Kegg\_MODY (n=23 genes in pathway) and Reactome\_Regulation of beta cell development (n=28 genes in pathway) with PDAC risk. The association evidence from the strongest SNP(s) (up to the two) in a gene were accumulated. Major allele is Ref (reference) allele. PDAC, pancreatic ductal adenocarcinoma; SNP, single nucleotide polymorphism; Chr, chromosome; OR, Odds Ratio; CI, confidence interval

†SNP P-values were calculated using the two-sided Wald's test. P-values and OR are shown in order of lowest P-value for PDAC in the combined PanScan 1, 2, 3 and PanC4.

**Supplementary Table 2: Biocarta\_Cardia EGF pathway**

| SNP*       | Gene         | Chr | Position  | Ref Allele | Risk Allele | OR   | 95% CI |       | P-value† |
|------------|--------------|-----|-----------|------------|-------------|------|--------|-------|----------|
|            |              |     |           |            |             |      | Lower  | Upper |          |
| rs1326889  | <i>AGT</i>   | 1   | 230862998 | C          | T           | 0.90 | 0.86   | 0.94  | 4.21E-07 |
| rs35232409 | <i>EDNRA</i> | 4   | 148396281 | G          | C           | 0.88 | 0.84   | 0.92  | 3.20E-07 |
| rs6537481  | <i>EDNRA</i> | 4   | 148396094 | A          | G           | 0.88 | 0.83   | 0.92  | 1.15E-07 |

\*SNPs contributing to the association of the BioCarta\_Cardia EGF pathway (n=17 genes in pathway) with PDAC risk. The association evidence from the strongest SNP(s) (up to the two) in a gene were accumulated. Major allele is Ref (reference) allele. PDAC, pancreatic ductal adenocarcinoma; SNP, single nucleotide polymorphism; Chr, chromosome; OR, Odds Ratio; CI, confidence interval

†SNP P-values were calculated using the two-sided Wald's test. P-values and OR are shown in order of lowest P-value for PDAC in the combined PanScan 1, 2, 3 and PanC4.

**Supplementary Table 3: Nikolsky\_breast cancer chr17 amplicon**

| <b>SNP*</b> | <b>Gene</b>   | <b>Chr</b> | <b>Position</b> | <b>Ref Allele</b> | <b>Risk Allele</b> | <b>OR</b> | <b>95% CI<br/>Lower</b> | <b>95% CI<br/>Upper</b> | <b>P-value†</b> |
|-------------|---------------|------------|-----------------|-------------------|--------------------|-----------|-------------------------|-------------------------|-----------------|
| rs876493    | <i>ERBB2</i>  | 17         | 37824545        | G                 | A                  | 0.90      | 0.86                    | 0.94                    | 1.27E-06        |
| rs876493    | <i>PGAP3</i>  | 17         | 37824545        | G                 | A                  | 0.90      | 0.86                    | 0.94                    | 1.27E-06        |
| rs876493    | <i>TCAP</i>   | 17         | 37824545        | G                 | A                  | 0.90      | 0.86                    | 0.94                    | 1.27E-06        |
| rs876493    | <i>STARD3</i> | 17         | 37824545        | G                 | A                  | 0.90      | 0.86                    | 0.94                    | 1.27E-06        |
| rs876493    | <i>PNMT</i>   | 17         | 37824545        | G                 | A                  | 0.90      | 0.86                    | 0.94                    | 1.27E-06        |
| rs12951345  | <i>HNF1B</i>  | 17         | 36077863        | A                 | C                  | 0.88      | 0.84                    | 0.93                    | 1.38E-06        |
| rs7223387   | <i>HNF1B</i>  | 17         | 36082473        | T                 | G                  | 0.89      | 0.85                    | 0.94                    | 3.46E-06        |
| rs8078692   | <i>THRA</i>   | 17         | 38215117        | A                 | G                  | 0.91      | 0.87                    | 0.95                    | 6.71E-06        |
| rs8078692   | <i>MED24</i>  | 17         | 38215117        | A                 | G                  | 0.91      | 0.87                    | 0.95                    | 6.71E-06        |
| rs7225411   | <i>IGFBP4</i> | 17         | 38620130        | T                 | C                  | 1.16      | 1.09                    | 1.23                    | 7.39E-06        |
| rs7225411   | <i>TNS4</i>   | 17         | 38620130        | T                 | C                  | 1.16      | 1.09                    | 1.23                    | 7.39E-06        |
| rs3764351   | <i>ERBB2</i>  | 17         | 37824339        | G                 | A                  | 0.91      | 0.87                    | 0.95                    | 1.27E-05        |
| rs3764351   | <i>PGAP3</i>  | 17         | 37824339        | G                 | A                  | 0.91      | 0.87                    | 0.95                    | 1.27E-05        |
| rs3764351   | <i>TCAP</i>   | 17         | 37824339        | G                 | A                  | 0.91      | 0.87                    | 0.95                    | 1.27E-05        |
| rs3764351   | <i>STARD3</i> | 17         | 37824339        | G                 | A                  | 0.91      | 0.87                    | 0.95                    | 1.27E-05        |
| rs3764351   | <i>PNMT</i>   | 17         | 37824339        | G                 | A                  | 0.91      | 0.87                    | 0.95                    | 1.27E-05        |
| rs113557550 | <i>TNS4</i>   | 17         | 38639070        | C                 | T                  | 1.25      | 1.13                    | 1.38                    | 2.35E-05        |
| rs76592685  | <i>IGFBP4</i> | 17         | 38630459        | A                 | G                  | 1.17      | 1.09                    | 1.26                    | 3.04E-05        |
| rs12451586  | <i>CDK12</i>  | 17         | 37633835        | T                 | A                  | 0.91      | 0.87                    | 0.95                    | 6.58E-05        |
| rs62074998  | <i>FBXL20</i> | 17         | 37480822        | C                 | A                  | 0.84      | 0.77                    | 0.92                    | 1.31E-04        |
| rs72823344  | <i>CACNB1</i> | 17         | 37351774        | G                 | A                  | 1.18      | 1.08                    | 1.29                    | 1.91E-04        |
| rs72823344  | <i>RPL19</i>  | 17         | 37351774        | G                 | A                  | 1.18      | 1.08                    | 1.29                    | 1.91E-04        |
| rs72823344  | <i>STAC2</i>  | 17         | 37351774        | G                 | A                  | 1.18      | 1.08                    | 1.29                    | 1.91E-04        |
| rs113520394 | <i>THRA</i>   | 17         | 38212046        | C                 | T                  | 0.89      | 0.84                    | 0.95                    | 2.13E-04        |
| rs113520394 | <i>MED24</i>  | 17         | 38212046        | C                 | T                  | 0.89      | 0.84                    | 0.95                    | 2.13E-04        |
| rs117811627 | <i>CCR7</i>   | 17         | 38691196        | T                 | C                  | 1.34      | 1.15                    | 1.56                    | 2.16E-04        |

|             |                 |    |          |   |   |      |      |      |          |
|-------------|-----------------|----|----------|---|---|------|------|------|----------|
| rs12453796  | <i>FBXL20</i>   | 17 | 37454997 | A | T | 0.91 | 0.86 | 0.96 | 3.11E-04 |
| rs883544    | <i>STAC2</i>    | 17 | 37387413 | A | G | 0.91 | 0.87 | 0.96 | 3.28E-04 |
| rs11652129  | <i>FOXN1</i>    | 17 | 26817115 | A | C | 1.26 | 1.10 | 1.43 | 5.05E-04 |
| rs1877032   | <i>NEUROD2</i>  | 17 | 37771064 | T | C | 1.13 | 1.05 | 1.20 | 6.60E-04 |
| rs1877032   | <i>PPP1R1B</i>  | 17 | 37771064 | T | C | 1.13 | 1.05 | 1.20 | 6.60E-04 |
| rs16964766  | <i>PIPOX</i>    | 17 | 27393310 | G | A | 1.10 | 1.04 | 1.17 | 6.84E-04 |
| rs16964766  | <i>TIAF1</i>    | 17 | 27393310 | G | A | 1.10 | 1.04 | 1.17 | 6.84E-04 |
| rs17721128  | <i>C17orf63</i> | 17 | 27143892 | A | G | 0.87 | 0.80 | 0.94 | 8.07E-04 |
| rs78126981  | <i>PIPOX</i>    | 17 | 27320567 | T | A | 0.76 | 0.65 | 0.89 | 8.18E-04 |
| rs78126981  | <i>SEZ6</i>     | 17 | 27320567 | T | A | 0.76 | 0.65 | 0.89 | 8.18E-04 |
| rs7222039   | <i>CSF3</i>     | 17 | 38165541 | T | C | 1.07 | 1.03 | 1.12 | 8.19E-04 |
| rs7222039   | <i>PSMD3</i>    | 17 | 38165541 | T | C | 1.07 | 1.03 | 1.12 | 8.19E-04 |
| rs111935829 | <i>GSDMB</i>    | 17 | 38081394 | C | G | 0.84 | 0.76 | 0.94 | 1.19E-03 |
| rs111935829 | <i>ORMDL3</i>   | 17 | 38081394 | C | G | 0.84 | 0.76 | 0.94 | 1.19E-03 |
| rs2227324   | <i>CSF3</i>     | 17 | 38172192 | G | A | 1.14 | 1.05 | 1.23 | 1.21E-03 |
| rs2227324   | <i>PSMD3</i>    | 17 | 38172192 | G | A | 1.14 | 1.05 | 1.23 | 1.21E-03 |
| rs2470201   | <i>TMEM98</i>   | 17 | 31250916 | G | A | 1.10 | 1.04 | 1.16 | 1.28E-03 |
| rs17676191  | <i>IKZF3</i>    | 17 | 37949924 | A | G | 1.12 | 1.04 | 1.20 | 1.68E-03 |
| rs750409    | <i>CACNB1</i>   | 17 | 37317211 | G | A | 0.87 | 0.80 | 0.95 | 1.78E-03 |
| rs147225757 | <i>CRYBA1</i>   | 17 | 27566770 | G | C | 0.72 | 0.58 | 0.89 | 2.12E-03 |
| rs75646943  | <i>IKZF3</i>    | 17 | 37954143 | C | T | 0.78 | 0.66 | 0.91 | 2.12E-03 |
| rs117237010 | <i>SEZ6</i>     | 17 | 27311692 | G | A | 1.32 | 1.10 | 1.58 | 2.31E-03 |
| rs12103674  | <i>PPP1R1B</i>  | 17 | 37804352 | T | C | 1.13 | 1.04 | 1.21 | 2.38E-03 |
| rs4795393   | <i>GRB7</i>     | 17 | 37893484 | C | T | 0.94 | 0.90 | 0.98 | 2.43E-03 |
| rs4795393   | <i>MIEN1</i>    | 17 | 37893484 | C | T | 0.94 | 0.90 | 0.98 | 2.43E-03 |
| rs147849562 | <i>FOXN1</i>    | 17 | 26855748 | G | A | 1.21 | 1.07 | 1.38 | 2.78E-03 |
| rs141786375 | <i>ERAL1</i>    | 17 | 27200588 | A | G | 0.77 | 0.64 | 0.91 | 2.82E-03 |
| rs28986     | <i>TMEM98</i>   | 17 | 31279321 | C | A | 1.20 | 1.06 | 1.37 | 3.45E-03 |
| rs12453507  | <i>GSDMB</i>    | 17 | 38053207 | C | G | 0.94 | 0.90 | 0.98 | 4.17E-03 |
| rs12453507  | <i>ZBP2</i>     | 17 | 38053207 | C | G | 0.94 | 0.90 | 0.98 | 4.17E-03 |
| rs74811341  | <i>CCR7</i>     | 17 | 38720826 | C | T | 0.85 | 0.76 | 0.95 | 4.59E-03 |

|             |                |    |          |   |   |      |      |      |          |
|-------------|----------------|----|----------|---|---|------|------|------|----------|
| rs191981826 | <i>SGK494</i>  | 17 | 26931189 | G | A | 1.10 | 1.03 | 1.17 | 6.83E-03 |
| rs191981826 | <i>SPAG5</i>   | 17 | 26931189 | G | A | 1.10 | 1.03 | 1.17 | 6.83E-03 |
| rs2665647   | <i>NEUROD2</i> | 17 | 37778907 | C | G | 1.25 | 1.06 | 1.48 | 7.23E-03 |
| rs10853129  | <i>ERAL1</i>   | 17 | 27191960 | G | A | 0.94 | 0.90 | 0.98 | 7.93E-03 |
| rs62068170  | <i>ORMDL3</i>  | 17 | 38103210 | G | A | 1.06 | 1.01 | 1.10 | 8.42E-03 |
| rs117006142 | <i>SGK494</i>  | 17 | 26939612 | T | A | 0.83 | 0.72 | 0.96 | 1.05E-02 |
| rs117006142 | <i>SPAG5</i>   | 17 | 26939612 | T | A | 0.83 | 0.72 | 0.96 | 1.05E-02 |
| rs8614      | <i>CRYBA1</i>  | 17 | 27588806 | C | A | 1.07 | 1.01 | 1.13 | 1.38E-02 |
| rs79062097  | <i>ZPBP2</i>   | 17 | 38043467 | C | T | 0.89 | 0.79 | 1.00 | 4.74E-02 |

\*SNPs contributing to the association of the Nikolsky\_Breast cancer chr 17 amplicon (n=131 genes in gene set) with PDAC risk. The association evidence from the strongest SNP(s) (up to the two) in a gene were accumulated. Major allele is Ref (reference) allele. PDAC, pancreatic ductal adenocarcinoma; SNP, single nucleotide polymorphism; Chr, chromosome; OR, Odds Ratio; CI, confidence interval

†SNP P-values were calculated using the two-sided Wald's test. P-values and OR are shown in order of lowest P-value for PDAC in the combined PanScan 1, 2,3 and PanC4.

**Supplementary Table 4: Pujana\_ATM\_PCC Network**

| SNP*        | Gene    | Chr | Position  | Ref Allele | Risk Allele | OR   | 95% CI Lower | 95% CI Upper | P-value† |
|-------------|---------|-----|-----------|------------|-------------|------|--------------|--------------|----------|
| rs7859034   | SMC2    | 9   | 106865692 | G          | T           | 0.90 | 0.86         | 0.93         | 3.07E-07 |
| rs876493    | PNMT    | 17  | 37824545  | G          | A           | 0.90 | 0.86         | 0.94         | 1.27E-06 |
| rs12951345  | HNF1B   | 17  | 36077863  | A          | C           | 0.88 | 0.84         | 0.93         | 1.38E-06 |
| rs57791062  | GRP     | 18  | 56880211  | C          | T           | 0.88 | 0.83         | 0.93         | 1.79E-06 |
| rs7223387   | HNF1B   | 17  | 36082473  | T          | G           | 0.89 | 0.85         | 0.94         | 3.46E-06 |
| rs8078692   | THRA    | 17  | 38215117  | A          | G           | 0.91 | 0.87         | 0.95         | 6.71E-06 |
| rs1169291   | HNF1A   | 12  | 121426064 | C          | T           | 1.11 | 1.06         | 1.16         | 8.39E-06 |
| rs34825318  | TAB1    | 22  | 39798237  | G          | A           | 1.35 | 1.18         | 1.54         | 1.11E-05 |
| rs4710491   | KHDRBS2 | 6   | 62507189  | A          | C           | 0.46 | 0.32         | 0.65         | 1.17E-05 |
| rs3764351   | PNMT    | 17  | 37824339  | G          | A           | 0.91 | 0.87         | 0.95         | 1.27E-05 |
| rs1169297   | HNF1A   | 12  | 121428455 | G          | A           | 1.10 | 1.05         | 1.15         | 1.40E-05 |
| rs2160263   | ACTR2   | 2   | 65509238  | C          | T           | 1.14 | 1.07         | 1.21         | 1.53E-05 |
| rs1913641   | HNF4G   | 8   | 76483239  | T          | G           | 1.10 | 1.05         | 1.14         | 1.55E-05 |
| rs641652    | TPP2    | 13  | 103339194 | G          | A           | 0.91 | 0.87         | 0.95         | 1.95E-05 |
| rs10071714  | GRIA1   | 5   | 153124891 | T          | C           | 0.90 | 0.85         | 0.94         | 1.98E-05 |
| rs2943547   | HNF4G   | 8   | 76451098  | A          | G           | 1.09 | 1.05         | 1.14         | 2.31E-05 |
| rs11636684  | HEXA    | 15  | 72663946  | A          | G           | 0.89 | 0.85         | 0.94         | 2.35E-05 |
| rs7579797   | ACTR2   | 2   | 65511539  | A          | G           | 0.91 | 0.88         | 0.95         | 2.61E-05 |
| rs3124737   | CASP7   | 10  | 115497095 | A          | G           | 0.91 | 0.88         | 0.95         | 3.29E-05 |
| rs62208272  | GHRH    | 20  | 35876666  | T          | C           | 1.31 | 1.15         | 1.48         | 3.57E-05 |
| rs114958362 | MED6    | 14  | 71032061  | G          | A           | 0.66 | 0.54         | 0.80         | 4.48E-05 |
| rs2615921   | HIPK3   | 11  | 33395054  | T          | C           | 0.86 | 0.80         | 0.93         | 5.55E-05 |
| rs118102857 | ITGBL1  | 13  | 102258101 | C          | T           | 1.40 | 1.19         | 1.64         | 5.83E-05 |
| rs113897737 | MED1    | 17  | 37581353  | C          | T           | 1.15 | 1.07         | 1.23         | 6.28E-05 |
| rs78106592  | FCHSD2  | 11  | 72647161  | G          | A           | 0.86 | 0.80         | 0.93         | 7.10E-05 |

|             |         |    |           |   |   |      |      |      |          |
|-------------|---------|----|-----------|---|---|------|------|------|----------|
| rs55717718  | PHOX2B  | 4  | 41768765  | T | C | 0.79 | 0.71 | 0.89 | 8.58E-05 |
| rs72919332  | HIPK3   | 11 | 33392100  | G | T | 0.85 | 0.78 | 0.92 | 8.78E-05 |
| rs12361597  | TMEM123 | 11 | 102337777 | G | A | 0.83 | 0.76 | 0.91 | 9.61E-05 |
| rs140127725 | LDHB    | 12 | 21900930  | A | G | 1.49 | 1.22 | 1.83 | 0.0001   |
| rs201611588 | HEXA    | 15 | 72617472  | T | C | 0.91 | 0.86 | 0.95 | 0.0001   |
| rs184199456 | PFKFB4  | 3  | 48586891  | G | A | 1.39 | 1.17 | 1.64 | 0.0001   |
| rs111345106 | CD47    | 3  | 107775269 | C | T | 1.28 | 1.13 | 1.45 | 0.0002   |
| rs138947508 | MAPK8   | 10 | 49566274  | A | G | 0.72 | 0.60 | 0.85 | 0.0002   |
| rs146071727 | HNRNPL  | 19 | 39315847  | C | G | 1.26 | 1.12 | 1.43 | 0.0002   |
| rs72823344  | RPL19   | 17 | 37351774  | G | A | 1.18 | 1.08 | 1.29 | 0.0002   |
| rs72779276  | TELO2   | 16 | 1551826   | C | G | 0.90 | 0.85 | 0.95 | 0.0002   |
| rs12522289  | HNRNPAB | 5  | 177640864 | A | G | 1.16 | 1.07 | 1.25 | 0.0002   |
| rs7212868   | MED1    | 17 | 37608052  | C | A | 0.92 | 0.88 | 0.96 | 0.0002   |
| rs7585054   | BCL2L11 | 2  | 111944927 | A | G | 0.92 | 0.89 | 0.96 | 0.0002   |
| rs113520394 | THRA    | 17 | 38212046  | C | T | 0.89 | 0.84 | 0.95 | 0.0002   |
| rs7148005   | BAZ1A   | 14 | 35319411  | C | G | 0.89 | 0.83 | 0.95 | 0.0002   |
| rs11070327  | OIP5    | 15 | 41602866  | G | A | 1.08 | 1.04 | 1.13 | 0.0002   |
| rs140573271 | CDC123  | 10 | 12305979  | G | A | 0.77 | 0.67 | 0.88 | 0.0002   |
| rs17215231  | PFDN6   | 6  | 33239869  | C | T | 0.86 | 0.79 | 0.93 | 0.0002   |
| rs7321404   | PIBF1   | 13 | 73351180  | A | T | 1.15 | 1.07 | 1.24 | 0.0003   |
| rs77381836  | NR2C1   | 12 | 95469581  | A | G | 0.74 | 0.63 | 0.87 | 0.0003   |
| rs10064416  | BTF3    | 5  | 72809050  | A | G | 1.17 | 1.07 | 1.27 | 0.0003   |
| rs114629468 | FBL     | 19 | 40320168  | G | A | 0.80 | 0.71 | 0.90 | 0.0003   |
| rs116905840 | ANGEL1  | 14 | 77271613  | G | A | 1.41 | 1.17 | 1.70 | 0.0003   |
| rs112646694 | PCF11   | 11 | 82893611  | C | T | 1.40 | 1.16 | 1.68 | 0.0003   |
| rs58812167  | GSR     | 8  | 30554938  | C | A | 0.93 | 0.89 | 0.97 | 0.0003   |
| rs73802720  | GRIA1   | 5  | 153067523 | T | C | 0.90 | 0.85 | 0.95 | 0.0003   |
| rs74704910  | FCHSD2  | 11 | 72799737  | T | G | 0.85 | 0.78 | 0.93 | 0.0003   |
| rs3749812   | HNRNPAB | 5  | 177650210 | T | C | 1.16 | 1.07 | 1.26 | 0.0003   |
| rs76504832  | POP4    | 19 | 30109535  | G | A | 0.78 | 0.68 | 0.90 | 0.0004   |
| rs6795254   | TRA2B   | 3  | 185622421 | C | T | 0.85 | 0.78 | 0.93 | 0.0004   |

|             |         |    |           |   |   |      |      |      |        |
|-------------|---------|----|-----------|---|---|------|------|------|--------|
| rs118117270 | PAX4    | 7  | 127263589 | T | C | 0.67 | 0.54 | 0.84 | 0.0004 |
| rs601269    | TPP2    | 13 | 103321992 | G | C | 0.91 | 0.86 | 0.96 | 0.0004 |
| rs111918710 | SIKE1   | 1  | 115309588 | C | A | 0.60 | 0.46 | 0.80 | 0.0004 |
| rs118025182 | BRCA1   | 17 | 41181639  | G | A | 0.80 | 0.71 | 0.91 | 0.0005 |
| rs10881645  | KIF20B  | 10 | 91490087  | A | G | 1.08 | 1.03 | 1.12 | 0.0005 |
| rs7188875   | NAE1    | 16 | 66917267  | A | C | 1.12 | 1.05 | 1.20 | 0.0005 |
| rs144972902 | ATXN3   | 14 | 92563474  | T | C | 1.24 | 1.10 | 1.41 | 0.0005 |
| rs34501420  | FAM53B  | 10 | 126304770 | G | C | 1.09 | 1.04 | 1.14 | 0.0005 |
| rs13260089  | GSR     | 8  | 30531154  | T | C | 0.89 | 0.83 | 0.95 | 0.0005 |
| rs182312279 | TACR3   | 4  | 104551730 | T | C | 0.81 | 0.72 | 0.91 | 0.0006 |
| rs2444857   | RPL30   | 8  | 99062480  | A | T | 0.93 | 0.89 | 0.97 | 0.0006 |
| rs140048312 | PMS2P1  | 7  | 99915673  | C | T | 0.73 | 0.61 | 0.87 | 0.0006 |
| rs1588327   | NPHP1   | 2  | 110891433 | A | C | 1.08 | 1.03 | 1.12 | 0.0006 |
| rs72847518  | TAF5    | 10 | 105127191 | A | C | 0.84 | 0.75 | 0.93 | 0.0006 |
| rs35223775  | NSL1    | 1  | 212879952 | C | T | 0.91 | 0.86 | 0.96 | 0.0006 |
| rs33948247  | E2F4    | 16 | 67235672  | C | T | 0.85 | 0.78 | 0.93 | 0.0006 |
| rs143786818 | FAM53B  | 10 | 126303382 | T | C | 1.29 | 1.11 | 1.49 | 0.0007 |
| rs142824527 | TACR3   | 4  | 104623592 | A | G | 0.79 | 0.69 | 0.90 | 0.0007 |
| rs11079803  | SP2     | 17 | 46019901  | G | A | 0.93 | 0.89 | 0.97 | 0.0007 |
| rs1062225   | MAPK8   | 10 | 49643226  | A | G | 0.90 | 0.84 | 0.96 | 0.0008 |
| rs7222039   | CSF3    | 17 | 38165541  | T | C | 1.07 | 1.03 | 1.12 | 0.0008 |
| rs7222039   | PSMD3   | 17 | 38165541  | T | C | 1.07 | 1.03 | 1.12 | 0.0008 |
| rs17037193  | SNRNP27 | 2  | 70103504  | T | C | 0.91 | 0.87 | 0.96 | 0.0009 |
| rs72856970  | NMI     | 2  | 152135335 | G | A | 1.20 | 1.08 | 1.33 | 0.0009 |
| rs2248014   | RPL30   | 8  | 99030280  | T | C | 0.92 | 0.88 | 0.97 | 0.0009 |
| rs72826897  | NPHP1   | 2  | 110926458 | A | G | 0.84 | 0.76 | 0.93 | 0.0009 |
| rs10416586  | POP4    | 19 | 30112997  | G | A | 0.85 | 0.78 | 0.94 | 0.0009 |
| rs8008960   | ANGEL1  | 14 | 77289618  | T | C | 0.92 | 0.88 | 0.97 | 0.0009 |
| rs76331936  | USP19   | 3  | 49141714  | G | A | 0.73 | 0.61 | 0.88 | 0.001  |
| rs192123848 | SP2     | 17 | 46013386  | G | A | 0.74 | 0.62 | 0.89 | 0.001  |
| rs676119    | BCL2L11 | 2  | 111912718 | A | G | 0.93 | 0.90 | 0.97 | 0.001  |



|             |        |    |           |   |   |      |      |      |       |
|-------------|--------|----|-----------|---|---|------|------|------|-------|
| rs11852609  | OIP5   | 15 | 41582598  | T | G | 1.08 | 1.03 | 1.12 | 0.001 |
| rs72678745  | BAZ1A  | 14 | 35272925  | C | T | 0.82 | 0.73 | 0.92 | 0.001 |
| rs2227324   | CSF3   | 17 | 38172192  | G | A | 1.14 | 1.05 | 1.23 | 0.001 |
| rs2227324   | PSMD3  | 17 | 38172192  | G | A | 1.14 | 1.05 | 1.23 | 0.001 |
| rs76790404  | AOC2   | 17 | 41018481  | G | C | 0.82 | 0.73 | 0.93 | 0.001 |
| rs141981996 | PMS2P1 | 7  | 99929614  | C | T | 0.90 | 0.84 | 0.96 | 0.001 |
| rs190904708 | HNRNPL | 19 | 39346267  | G | A | 0.73 | 0.60 | 0.88 | 0.001 |
| rs4951457   | NSL1   | 1  | 212879500 | A | C | 1.08 | 1.03 | 1.13 | 0.001 |
| rs8014854   | ATXN3  | 14 | 92550658  | G | A | 1.07 | 1.03 | 1.12 | 0.001 |
| rs11687575  | NMI    | 2  | 152156771 | C | T | 1.14 | 1.05 | 1.23 | 0.002 |
| rs10794501  | GPR3   | 1  | 27699449  | A | T | 1.09 | 1.03 | 1.16 | 0.002 |
| rs62483175  | PAX4   | 7  | 127247114 | C | T | 0.78 | 0.67 | 0.91 | 0.002 |
| rs11707940  | USP4   | 3  | 49363772  | T | A | 0.92 | 0.87 | 0.97 | 0.002 |
| rs368987508 | KIF20B | 10 | 91548385  | A | T | 1.07 | 1.02 | 1.12 | 0.002 |
| rs1050450   | USP4   | 3  | 49394834  | G | A | 0.93 | 0.89 | 0.98 | 0.003 |
| rs2504765   | GPR3   | 1  | 27741131  | C | T | 0.90 | 0.84 | 0.96 | 0.003 |
| rs146494007 | PCF11  | 11 | 82867659  | T | G | 0.79 | 0.68 | 0.92 | 0.003 |
| rs35996049  | RPL19  | 17 | 37375354  | G | A | 1.13 | 1.04 | 1.22 | 0.003 |
| rs145088470 | AOC2   | 17 | 41020181  | G | T | 0.71 | 0.57 | 0.89 | 0.003 |
| rs12923138  | E2F4   | 16 | 67233266  | A | C | 0.94 | 0.91 | 0.99 | 0.008 |
| rs185050272 | USP19  | 3  | 49151003  | G | A | 0.83 | 0.70 | 0.97 | 0.02  |

\*SNPs contributing to the association of the Pujana\_ATM PCC network (n=1350 genes in pathway) with PDAC risk. The association evidence from the strongest SNP(s) (up to the two) in a gene were accumulated. Major allele is Ref (reference) allele. PCC, Pearson's correlation coefficient; PDAC, pancreatic ductal adenocarcinoma; SNP, single nucleotide polymorphism; Chr, chromosome; OR, Odds Ratio; CI, confidence interval

†SNP P-values were calculated using the two-sided Wald's test. P-values and OR are shown in order of lowest P-value for PDAC in the combined PanScan 1, 2,3 and PanC4.

**Supplementary Table 5: Top SNPs in genes in the top ranked PDAC associated gene sets and pathways**

| Candidate SNP* | Gene                                     | Chr | Position  | Ref Allele | Risk Allele | OR   | 95% CI Lower | 95% CI Upper | P-value† | Pathway/gene set                      |
|----------------|------------------------------------------|-----|-----------|------------|-------------|------|--------------|--------------|----------|---------------------------------------|
| rs6537481      | EDNRA                                    | 4   | 148396094 | A          | G           | 0.88 | 0.83         | 0.92         | 1.15E-07 | Cardiac EGF Pathway                   |
| rs1169296      | HNF1A                                    | 12  | 121428407 | A          | G           | 1.12 | 1.07         | 1.17         | 2.63E-07 | MODY, Beta Cell Dev                   |
| rs7859034      | SMC2                                     | 9   | 106865692 | G          | T           | 0.90 | 0.86         | 0.93         | 3.07E-07 | Pujana                                |
| rs35232409     | EDNRA                                    | 4   | 148396281 | G          | C           | 0.88 | 0.84         | 0.92         | 3.20E-07 | Cardiac EGF Pathway                   |
| rs1326889      | AGT                                      | 1   | 230862998 | C          | T           | 0.90 | 0.86         | 0.94         | 4.21E-07 | Cardiac EGF Pathway                   |
| rs876493       | ERBB2<br>PGAP3<br>TCAP<br>STARD3<br>PNMT | 17  | 37824545  | G          | A           | 0.90 | 0.86         | 0.94         | 1.27E-06 | Nikolsky, Pujana                      |
| rs12951345     | HNF1B                                    | 17  | 36077863  | A          | C           | 0.88 | 0.84         | 0.93         | 1.38E-06 | MODY, Beta Cell Dev, Nikolsky, Pujana |
| rs2244608      | HNF1A                                    | 12  | 121416988 | A          | G           | 1.11 | 1.07         | 1.16         | 1.54E-06 | MODY, Beta Cell Dev                   |
| rs57791062     | GRP                                      | 18  | 56880211  | C          | T           | 0.88 | 0.83         | 0.93         | 1.79E-06 | Pujana                                |
| rs7223387      | HNF1B                                    | 17  | 36082473  | T          | G           | 0.89 | 0.85         | 0.94         | 3.46E-06 | MODY, Beta Cell Dev, Nikolsky, Pujana |
| rs8078692      | THRA<br>MED24                            | 17  | 38215117  | A          | G           | 0.91 | 0.87         | 0.95         | 6.71E-06 | Nikolsky, Pujana                      |
| rs7225411      | IGFBP4<br>TNS4                           | 17  | 38620130  | T          | C           | 1.16 | 1.09         | 1.23         | 7.39E-06 | Nikolsky                              |
| rs1169291      | HNF1A                                    | 12  | 121426064 | C          | T           | 1.11 | 1.06         | 1.16         | 8.39E-06 | Pujana                                |
| rs34825318     | TAB1                                     | 22  | 39798237  | G          | A           | 1.35 | 1.18         | 1.54         | 1.11E-05 | Pujana                                |
| rs4710491      | KHDRBS2                                  | 6   | 62507189  | A          | C           | 0.46 | 0.32         | 0.65         | 1.17E-05 | Pujana                                |
| rs3764351      | ERBB2<br>PGAP3<br>TCAP<br>STARD3<br>PNMT | 17  | 37824339  | G          | A           | 0.91 | 0.87         | 0.95         | 1.27E-05 | Nikolsky, Pujana                      |
| rs1169297      | HNF1A                                    | 12  | 121428455 | G          | A           | 1.10 | 1.05         | 1.15         | 1.40E-05 | Pujana                                |
| rs2160263      | ACTR2                                    | 2   | 65509238  | C          | T           | 1.14 | 1.07         | 1.21         | 1.53E-05 | Pujana                                |
| rs1913641      | HNF4G                                    | 8   | 76483239  | T          | G           | 1.10 | 1.05         | 1.14         | 1.55E-05 | MODY, Beta Cell Dev, Pujana           |

|             |                          |    |           |   |   |      |      |      |          |                             |
|-------------|--------------------------|----|-----------|---|---|------|------|------|----------|-----------------------------|
| rs1853150   | HNF4A                    | 20 | 43081164  | G | T | 1.10 | 1.05 | 1.15 | 1.64E-05 | MODY, Beta Cell Dev         |
| rs641652    | TPP2                     | 13 | 103339194 | G | A | 0.91 | 0.87 | 0.95 | 1.95E-05 | Pujana                      |
| rs10071714  | GRIA1                    | 5  | 153124891 | T | C | 0.90 | 0.85 | 0.94 | 1.98E-05 | Pujana                      |
| rs2943547   | HNF4G                    | 8  | 76451098  | A | G | 1.09 | 1.05 | 1.14 | 2.31E-05 | MODY, Beta Cell Dev, Pujana |
| rs11636684  | HEXA                     | 15 | 72663946  | A | G | 0.89 | 0.85 | 0.94 | 2.35E-05 | Pujana                      |
| rs113557550 | TNS4                     | 17 | 38639070  | C | T | 1.25 | 1.13 | 1.38 | 2.35E-05 | Nikolsky                    |
| rs7579797   | ACTR2                    | 2  | 65511539  | A | G | 0.91 | 0.88 | 0.95 | 2.61E-05 | Pujana                      |
| rs76592685  | IGFBP4                   | 17 | 38630459  | A | G | 1.17 | 1.09 | 1.26 | 3.04E-05 | Nikolsky                    |
| rs3124737   | CASP7                    | 10 | 115497095 | A | G | 0.91 | 0.88 | 0.95 | 3.29E-05 | Pujana                      |
| rs62208272  | GHRH                     | 20 | 35876666  | T | C | 1.31 | 1.15 | 1.48 | 3.57E-05 | Pujana                      |
| rs114958362 | MED6                     | 14 | 71032061  | G | A | 0.66 | 0.54 | 0.80 | 4.48E-05 | Pujana                      |
| rs2615921   | HIPK3                    | 11 | 33395054  | T | C | 0.86 | 0.80 | 0.93 | 5.55E-05 | Pujana                      |
| rs118102857 | ITGBL1                   | 13 | 102258101 | C | T | 1.40 | 1.19 | 1.64 | 5.83E-05 | Pujana                      |
| rs113897737 | MED1                     | 17 | 37581353  | C | T | 1.15 | 1.07 | 1.23 | 6.28E-05 | Pujana                      |
| rs12451586  | CDK12                    | 17 | 37633835  | T | A | 0.91 | 0.87 | 0.95 | 6.58E-05 | Nikolsky                    |
| rs78106592  | FCHSD2                   | 11 | 72647161  | G | A | 0.86 | 0.80 | 0.93 | 7.10E-05 | Pujana                      |
| rs55717718  | PHOX2B                   | 4  | 41768765  | T | C | 0.79 | 0.71 | 0.89 | 8.58E-05 | Pujana                      |
| rs72919332  | HIPK3                    | 11 | 33392100  | G | T | 0.85 | 0.78 | 0.92 | 8.78E-05 | Pujana                      |
| rs12361597  | TMEM123                  | 11 | 102337777 | G | A | 0.83 | 0.76 | 0.91 | 9.61E-05 | Pujana                      |
| rs140127725 | LDHB                     | 12 | 21900930  | A | G | 1.49 | 1.22 | 1.83 | 0.0001   | Pujana                      |
| rs201611588 | HEXA                     | 15 | 72617472  | T | C | 0.91 | 0.86 | 0.95 | 0.0001   | Pujana                      |
| rs62074998  | FBXL20                   | 17 | 37480822  | C | A | 0.84 | 0.77 | 0.92 | 0.0001   | Nikolsky                    |
| rs184199456 | PFKFB4                   | 3  | 48586891  | G | A | 1.39 | 1.17 | 1.64 | 0.0001   | Pujana                      |
| rs111345106 | CD47                     | 3  | 107775269 | C | T | 1.28 | 1.13 | 1.45 | 0.0002   | Pujana                      |
| rs138947508 | MAPK8                    | 10 | 49566274  | A | G | 0.72 | 0.60 | 0.85 | 0.0002   | Pujana                      |
| rs146071727 | HNRNPL                   | 19 | 39315847  | C | G | 1.26 | 1.12 | 1.43 | 0.0002   | Pujana                      |
| rs72823344  | CACNB1<br>RPL19<br>STAC2 | 17 | 37351774  | G | A | 1.18 | 1.08 | 1.29 | 0.0002   | Nikolsky, Pujana            |
| rs72779276  | TELO2                    | 16 | 1551826   | C | G | 0.90 | 0.85 | 0.95 | 0.0002   | Pujana                      |
| rs12522289  | HNRNPAB                  | 5  | 177640864 | A | G | 1.16 | 1.07 | 1.25 | 0.0002   | Pujana                      |
| rs7212868   | MED1                     | 17 | 37608052  | C | A | 0.92 | 0.88 | 0.96 | 0.0002   | Pujana                      |
| rs7585054   | BCL2L11                  | 2  | 111944927 | A | G | 0.92 | 0.89 | 0.96 | 0.0002   | Pujana                      |
| rs113520394 | THRA                     | 17 | 38212046  | C | T | 0.89 | 0.84 | 0.95 | 0.0002   | Nikolsky, Pujana            |

|             |         |    |           |   |   |      |      |      |        |              |
|-------------|---------|----|-----------|---|---|------|------|------|--------|--------------|
|             | MED24   |    |           |   |   |      |      |      |        |              |
| rs117811627 | CCR7    | 17 | 38691196  | T | C | 1.34 | 1.15 | 1.56 | 0.0002 | Nikolsky     |
| rs7148005   | BAZ1A   | 14 | 35319411  | C | G | 0.89 | 0.83 | 0.95 | 0.0002 | Pujana       |
| rs11070327  | OIP5    | 15 | 41602866  | G | A | 1.08 | 1.04 | 1.13 | 0.0002 | Pujana       |
| rs140573271 | CDC123  | 10 | 12305979  | G | A | 0.77 | 0.67 | 0.88 | 0.0002 | Pujana       |
| rs17215231  | PFDN6   | 6  | 33239869  | C | T | 0.86 | 0.79 | 0.93 | 0.0002 | Pujana       |
| rs7321404   | PIBF1   | 13 | 73351180  | A | T | 1.15 | 1.07 | 1.24 | 0.0003 | Pujana       |
| rs77381836  | NR2C1   | 12 | 95469581  | A | G | 0.74 | 0.63 | 0.87 | 0.0003 | Pujana       |
| rs10064416  | BTF3    | 5  | 72809050  | A | G | 1.17 | 1.07 | 1.27 | 0.0003 | Pujana       |
| rs114629468 | FBL     | 19 | 40320168  | G | A | 0.80 | 0.71 | 0.90 | 0.0003 | Pujana       |
| rs116905840 | ANGEL1  | 14 | 77271613  | G | A | 1.41 | 1.17 | 1.70 | 0.0003 | Pujana       |
| rs12453796  | FBXL20  | 17 | 37454997  | A | T | 0.91 | 0.86 | 0.96 | 0.0003 | Nikolsky     |
| rs112646694 | PCF11   | 11 | 82893611  | C | T | 1.40 | 1.16 | 1.68 | 0.0003 | Pujana       |
| rs58812167  | GSR     | 8  | 30554938  | C | A | 0.93 | 0.89 | 0.97 | 0.0003 | Pujana       |
| rs73802720  | GRIA1   | 5  | 153067523 | T | C | 0.90 | 0.85 | 0.95 | 0.0003 | Pujana       |
| rs883544    | STAC2   | 17 | 37387413  | A | G | 0.91 | 0.87 | 0.96 | 0.0003 | Nikolsky     |
| rs74704910  | FCHSD2  | 11 | 72799737  | T | G | 0.85 | 0.78 | 0.93 | 0.0003 | Pujana       |
| rs3749812   | HNRNPAB | 5  | 177650210 | T | C | 1.16 | 1.07 | 1.26 | 0.0003 | Pujana       |
| rs76504832  | POP4    | 19 | 30109535  | G | A | 0.78 | 0.68 | 0.90 | 0.0004 | Pujana       |
| rs6795254   | TRA2B   | 3  | 185622421 | C | T | 0.85 | 0.78 | 0.93 | 0.0004 | Pujana       |
| rs118117270 | PAX4    | 7  | 127263589 | T | C | 0.67 | 0.54 | 0.84 | 0.0004 | MODY, Pujana |
| rs601269    | TPP2    | 13 | 103321992 | G | C | 0.91 | 0.86 | 0.96 | 0.0004 | Pujana       |
| rs111918710 | SIKE1   | 1  | 115309588 | C | A | 0.60 | 0.46 | 0.80 | 0.0004 | Pujana       |
| rs118025182 | BRCA1   | 17 | 41181639  | G | A | 0.80 | 0.71 | 0.91 | 0.0005 | Pujana       |
| rs10881645  | KIF20B  | 10 | 91490087  | A | G | 1.08 | 1.03 | 1.12 | 0.0005 | Pujana       |
| rs7188875   | NAE1    | 16 | 66917267  | A | C | 1.12 | 1.05 | 1.20 | 0.0005 | Pujana       |
| rs11652129  | FOXN1   | 17 | 26817115  | A | C | 1.26 | 1.10 | 1.43 | 0.0005 | Nikolsky     |
| rs144972902 | ATXN3   | 14 | 92563474  | T | C | 1.24 | 1.10 | 1.41 | 0.0005 | Pujana       |
| rs34501420  | FAM53B  | 10 | 126304770 | G | C | 1.09 | 1.04 | 1.14 | 0.0005 | Pujana       |
| rs13260089  | GSR     | 8  | 30531154  | T | C | 0.89 | 0.83 | 0.95 | 0.0005 | Pujana       |
| rs182312279 | TACR3   | 4  | 104551730 | T | C | 0.81 | 0.72 | 0.91 | 0.0006 | Pujana       |
| rs2444857   | RPL30   | 8  | 99062480  | A | T | 0.93 | 0.89 | 0.97 | 0.0006 | Pujana       |
| rs140048312 | PMS2P1  | 7  | 99915673  | C | T | 0.73 | 0.61 | 0.87 | 0.0006 | Pujana       |
| rs1588327   | NPHP1   | 2  | 110891433 | A | C | 1.08 | 1.03 | 1.12 | 0.0006 | Pujana       |

|             |                    |    |           |   |   |      |      |      |        |                  |
|-------------|--------------------|----|-----------|---|---|------|------|------|--------|------------------|
| rs72847518  | TAF5               | 10 | 105127191 | A | C | 0.84 | 0.75 | 0.93 | 0.0006 | Pujana           |
| rs35223775  | NSL1               | 1  | 212879952 | C | T | 0.91 | 0.86 | 0.96 | 0.0006 | Pujana           |
| rs33948247  | E2F4               | 16 | 67235672  | C | T | 0.85 | 0.78 | 0.93 | 0.0006 | Pujana           |
| rs143786818 | FAM53B             | 10 | 126303382 | T | C | 1.29 | 1.11 | 1.49 | 0.0007 | Pujana           |
| rs142824527 | TACR3              | 4  | 104623592 | A | G | 0.79 | 0.69 | 0.90 | 0.0007 | Pujana           |
| rs1877032   | NEUROD2<br>PPP1R1B | 17 | 37771064  | T | C | 1.13 | 1.05 | 1.20 | 0.0007 | Nikolsky         |
| rs16964766  | PIPOX<br>TIAF1     | 17 | 27393310  | G | A | 1.10 | 1.04 | 1.17 | 0.0007 | Nikolsky         |
| rs11079803  | SP2                | 17 | 46019901  | G | A | 0.93 | 0.89 | 0.97 | 0.0007 | Pujana           |
| rs1062225   | MAPK8              | 10 | 49643226  | A | G | 0.90 | 0.84 | 0.96 | 0.0008 | Pujana           |
| rs17721128  | C17orf63           | 17 | 27143892  | A | G | 0.87 | 0.80 | 0.94 | 0.0008 | Nikolsky         |
| rs78126981  | PIPOX<br>SEZ6      | 17 | 27320567  | T | A | 0.76 | 0.65 | 0.89 | 0.0008 | Nikolsky         |
| rs7222039   | CSF3<br>PSMD3      | 17 | 38165541  | T | C | 1.07 | 1.03 | 1.12 | 0.0008 | Nikolsky, Pujana |
| rs17037193  | SNRNP27            | 2  | 70103504  | T | C | 0.91 | 0.87 | 0.96 | 0.0009 | Pujana           |
| rs72856970  | NMI                | 2  | 152135335 | G | A | 1.20 | 1.08 | 1.33 | 0.0009 | Pujana           |
| rs2248014   | RPL30              | 8  | 99030280  | T | C | 0.92 | 0.88 | 0.97 | 0.0009 | Pujana           |
| rs72826897  | NPHP1              | 2  | 110926458 | A | G | 0.84 | 0.76 | 0.93 | 0.0009 | Pujana           |
| rs10416586  | POP4               | 19 | 30112997  | G | A | 0.85 | 0.78 | 0.94 | 0.0009 | Pujana           |
| rs8008960   | ANGEL1             | 14 | 77289618  | T | C | 0.92 | 0.88 | 0.97 | 0.0009 | Pujana           |
| rs76331936  | USP19              | 3  | 49141714  | G | A | 0.73 | 0.61 | 0.88 | 0.001  | Pujana           |
| rs192123848 | SP2                | 17 | 46013386  | G | A | 0.74 | 0.62 | 0.89 | 0.001  | Pujana           |
| rs676119    | BCL2L11            | 2  | 111912718 | A | G | 0.93 | 0.90 | 0.97 | 0.001  | Pujana           |
| rs11852609  | OIP5               | 15 | 41582598  | T | G | 1.08 | 1.03 | 1.12 | 0.001  | Pujana           |
| rs111935829 | GSDMB<br>ORMDL3    | 17 | 38081394  | C | G | 0.84 | 0.76 | 0.94 | 0.001  | Nikolsky         |
| rs72678745  | BAZ1A              | 14 | 35272925  | C | T | 0.82 | 0.73 | 0.92 | 0.001  | Pujana           |
| rs2227324   | CSF3<br>PSMD3      | 17 | 38172192  | G | A | 1.14 | 1.05 | 1.23 | 0.001  | Nikolsky, Pujana |
| rs76790404  | AOC2               | 17 | 41018481  | G | C | 0.82 | 0.73 | 0.93 | 0.001  | Pujana           |
| rs2470201   | TMEM98             | 17 | 31250916  | G | A | 1.10 | 1.04 | 1.16 | 0.001  | Nikolsky         |
| rs141981996 | PMS2P1             | 7  | 99929614  | C | T | 0.90 | 0.84 | 0.96 | 0.001  | Pujana           |

|             |                 |    |           |   |   |      |      |      |       |              |
|-------------|-----------------|----|-----------|---|---|------|------|------|-------|--------------|
| rs190904708 | HNRNPL          | 19 | 39346267  | G | A | 0.73 | 0.60 | 0.88 | 0.001 | Pujana       |
| rs4951457   | NSL1            | 1  | 212879500 | A | C | 1.08 | 1.03 | 1.13 | 0.001 | Pujana       |
| rs8014854   | ATXN3           | 14 | 92550658  | G | A | 1.07 | 1.03 | 1.12 | 0.001 | Pujana       |
| rs11687575  | NMI             | 2  | 152156771 | C | T | 1.14 | 1.05 | 1.23 | 0.002 | Pujana       |
| rs17676191  | IKZF3           | 17 | 37949924  | A | G | 1.12 | 1.04 | 1.20 | 0.002 | Nikolsky     |
| rs10794501  | GPR3            | 1  | 27699449  | A | T | 1.09 | 1.03 | 1.16 | 0.002 | Pujana       |
| rs750409    | CACNB1          | 17 | 37317211  | G | A | 0.87 | 0.80 | 0.95 | 0.002 | Nikolsky     |
| rs147225757 | CRYBA1          | 17 | 27566770  | G | C | 0.72 | 0.58 | 0.89 | 0.002 | Nikolsky     |
| rs75646943  | IKZF3           | 17 | 37954143  | C | T | 0.78 | 0.66 | 0.91 | 0.002 | Nikolsky     |
| rs62483175  | PAX4            | 7  | 127247114 | C | T | 0.78 | 0.67 | 0.91 | 0.002 | MODY, Pujana |
| rs117237010 | SEZ6            | 17 | 27311692  | G | A | 1.32 | 1.10 | 1.58 | 0.002 | Nikolsky     |
| rs11707940  | USP4            | 3  | 49363772  | T | A | 0.92 | 0.87 | 0.97 | 0.002 | Pujana       |
| rs12103674  | PPP1R1B         | 17 | 37804352  | T | C | 1.13 | 1.04 | 1.21 | 0.002 | Nikolsky     |
| rs368987508 | KIF20B          | 10 | 91548385  | A | T | 1.07 | 1.02 | 1.12 | 0.002 | Pujana       |
| rs4795393   | GRB7<br>MIEN1   | 17 | 37893484  | C | T | 0.94 | 0.90 | 0.98 | 0.002 | Nikolsky     |
| rs1050450   | USP4            | 3  | 49394834  | G | A | 0.93 | 0.89 | 0.98 | 0.003 | Pujana       |
| rs2504765   | GPR3            | 1  | 27741131  | C | T | 0.90 | 0.84 | 0.96 | 0.003 | Pujana       |
| rs146494007 | PCF11           | 11 | 82867659  | T | G | 0.79 | 0.68 | 0.92 | 0.003 | Pujana       |
| rs35996049  | RPL19           | 17 | 37375354  | G | A | 1.13 | 1.04 | 1.22 | 0.003 | Pujana       |
| rs147849562 | FOXN1           | 17 | 26855748  | G | A | 1.21 | 1.07 | 1.38 | 0.003 | Nikolsky     |
| rs141786375 | ERAL1           | 17 | 27200588  | A | G | 0.77 | 0.64 | 0.91 | 0.003 | Nikolsky     |
| rs145088470 | AOC2            | 17 | 41020181  | G | T | 0.71 | 0.57 | 0.89 | 0.003 | Pujana       |
| rs28986     | TMEM98          | 17 | 31279321  | C | A | 1.20 | 1.06 | 1.37 | 0.003 | Nikolsky     |
| rs12453507  | GSDMB<br>ZPBP2  | 17 | 38053207  | C | G | 0.94 | 0.90 | 0.98 | 0.004 | Nikolsky     |
| rs74811341  | CCR7            | 17 | 38720826  | C | T | 0.85 | 0.76 | 0.95 | 0.005 | Nikolsky     |
| rs191981826 | SGK494<br>SPAG5 | 17 | 26931189  | G | A | 1.10 | 1.03 | 1.17 | 0.007 | Nikolsky     |
| rs2665647   | NEUROD2         | 17 | 37778907  | C | G | 1.25 | 1.06 | 1.48 | 0.007 | Nikolsky     |
| rs10853129  | ERAL1           | 17 | 27191960  | G | A | 0.94 | 0.90 | 0.98 | 0.008 | Nikolsky     |
| rs62068170  | ORMDL3          | 17 | 38103210  | G | A | 1.06 | 1.01 | 1.10 | 0.008 | Nikolsky     |
| rs12923138  | E2F4            | 16 | 67233266  | A | C | 0.94 | 0.91 | 0.99 | 0.008 | Pujana       |

|             |                  |    |          |   |   |      |      |      |      |          |
|-------------|------------------|----|----------|---|---|------|------|------|------|----------|
| rs117006142 | SGK494,<br>SPAG5 | 17 | 26939612 | T | A | 0.83 | 0.72 | 0.96 | 0.01 | Nikolsky |
| rs8614      | CRYBA1           | 17 | 27588806 | C | A | 1.07 | 1.01 | 1.13 | 0.01 | Nikolsky |
| rs185050272 | USP19            | 3  | 49151003 | G | A | 0.83 | 0.70 | 0.97 | 0.02 | Pujana   |
| rs79062097  | ZPBP2            | 17 | 38043467 | C | T | 0.89 | 0.79 | 1.00 | 0.05 | Nikolsky |

\*SNPs in the top ranked PDAC associated gene sets and pathways. The association evidence from the strongest SNP(s) (up to the two) in a gene were accumulated. Major allele is Ref (reference) allele. PDAC, pancreatic ductal adenocarcinoma; SNP, single nucleotide polymorphism; Chr, chromosome; OR, Odds Ratio; CI, confidence interval

†SNP P-values were calculated using the two-sided Wald's test. P-values and OR are shown in order of lowest P-value for PDAC in the combined PanScan 1, 2, 3 and PanC4.

**Supplementary Table 6: Pathways and gene sets associated with PDAC after exclusion of 4 new GWAS SNPs\* (plus 1 MB exclusion region)**

| Gene set and Pathway Description            | Pathway source | Gene, n | SNP, n | P-value† | Genes contributing to the association of pathway and PDAC development                                                                                                                                                                                                                                                                                                                                                                                                           |
|---------------------------------------------|----------------|---------|--------|----------|---------------------------------------------------------------------------------------------------------------------------------------------------------------------------------------------------------------------------------------------------------------------------------------------------------------------------------------------------------------------------------------------------------------------------------------------------------------------------------|
| Breast cancer chr17q11q21 amplicon          | Nikolsky       | 109     | 4052   | 5.71E-06 | <i>C17orf63, CACNB1, CASC3, CCL3, CCL4, CCR7, CDK12, CRYBA1, CSF3, DHRS13, ERAL1, ERBB2, FBXL2, FLOT2, FOXN1, GRB7, GSDMA, GSDMB, IGFBP4, IKZF3, KIAA0100, KRT24, KRTAP9-4, LSP1, MED24, MSL1, MYO18A, NEUROD2, NR1D1, NUFIP2, ORM DL3, PGAP3, PHF12, PIPOX, PPP1R1B, PSMD3, RAPGEFL1, RPL19, SLC13A2, SPAG5, STAC2, STARD3, TCAP, THRA, TMEM98, TNS4, TRAF4, UNC119, WIPF2, ZBP2</i>                                                                                           |
| ATM Pearson Correlation Coefficient network | Pujana         | 1343    | 78689  | 3.59E-04 | <i>ACTR2, ANGEL1, AOC2, ATXN3, BAZ1A, BCL2L11, BRCA1, BTF3, CASP7, CD47, CDC123, CR1, CSF3, E2F4, FAM53B, FBL, FCHSD2, GHRH, GPR3, GRIA1, GSR, HEXA, HIPK3, HNF1A, HNRNPAB, HNRNPL, ITGBL1, KHDRBS2, KIF20B, LDHB, MAPK8, MED1, MED6, NAE1, NMI, NPHP1, NR2C1, NSL1, OIP5, PAX4, PCF11, PDAP1, PFDN6, PFKFB4, PHOX2B, PIBF1, PMS2P1, PNMT, POP4, PSMD3, RPL19, RPL30, SIKE1, SMC2, SNRNP27, SP2, TAB1, TACR3, TAF5, TELO2, THRA, TMEM123, TNFAIP8, TPP2, TRA2B, USP19, USP4</i> |
| Breast cancer basal (down)                  | SMID           | 666     | 60866  | 4.29E-04 | <i>BAI2, BBS4, C5orf30, C9orf116, CAMP, CANT1, CAPN9, CDK12, CSF3R, CXXC4, ERBB2, EVL, HPGD, IFT140, IGFBP4, ITGA7, ITGBL1, KRT8, MED13L, MED24, PGAP3, PNMT, RAB27B, RAPGEF3, RARA, RHOH, SCGB2A2, SLC19A2, SLC48A1, STARD3, TMEM143, UBA7, VAV3</i>                                                                                                                                                                                                                           |
| Developmental biology                       | Reactome       | 363     | 37609  | 4.36E-04 | <i>AP2S1, CACNA1I, CACNB1, DPYSL4, ERBB2, EVL, EZR, FES, FURIN, HFE2, HNF1A, HNF4A, HSP90AB1, ITGA2, ITGAV, KIAA1598, MED1, MED13L, MED21, MED24, MED6, MET, MYH10, MYL8P, NCOR1, NR2F2, PLXND1, RHOC, ROBO1, ROCK1P1, SDCBP, SEMA3E, SRGAP1, TCF4, UNC5A, WASL</i>                                                                                                                                                                                                             |
| Maturity onset diabetes of the young        | KEGG           | 21      | 1177   | 5.49E-04 | <i>HNF1A, HNF4A, PAX4</i>                                                                                                                                                                                                                                                                                                                                                                                                                                                       |
| Regulation of gene expression in beta cells | Reactome       | 18      | 1135   | 5.63E-04 | <i>HNF1A, HNF4A</i>                                                                                                                                                                                                                                                                                                                                                                                                                                                             |
| Regulation of beta cell development         | Reactome       | 26      | 1786   | 0.001    | <i>HNF1A, HNF4A</i>                                                                                                                                                                                                                                                                                                                                                                                                                                                             |
| Prostate cancer HCP with H3K27ME3           | Kondo          | 90      | 10568  | 0.01     | <i>KIAA1109, LIMCH1, LINC00273, NKX2-3</i>                                                                                                                                                                                                                                                                                                                                                                                                                                      |

\*Four newly confirmed GWAS hits (rs13303010 at 1p36.33 (NOC2L); rs2941471 at 8q21.11 (HNF4G); rs4795218 at 17q12 (HNF1B) and rs1517037 at 18q21.32 (GRP) (Klein et al. 2018)) were removed from the analysis.



† The pathway-level association  $P$ -values were estimated from the resampled null distribution through up to one hundred million resampling steps as described in methods section. All statistical tests were two-sided.

**Supplementary Table 7: eQTL prediction of top signals in normal tissues using GTEx data and replication in independent normal pancreas dataset\*.**

| Gene in pathway /gene set analysis                                                                       | Chr | SNP         | Ref Allele | Risk Allele | GTEx Pancreas (n=220) Gene <sup>†</sup> P-value <sup>‡</sup> | NCI LTG Normal pancreas tissue (n=95) Gene <sup>†</sup> P-value <sup>‡</sup> | GTEx Nerve Tibial (n=361) Gene <sup>†</sup> P-value <sup>‡</sup> | GTEx Thyroid (n=399) Gene <sup>†</sup> P-value <sup>‡</sup> | GTEx Artery Tibial (n=388) Gene <sup>†</sup> P-value <sup>‡</sup> | GTEx Lung (n=383) Gene <sup>†</sup> P-value <sup>‡</sup> | GTEx Sun Exposed Skin (LL) (n=414) Gene <sup>†</sup> P-value <sup>‡</sup> | GTEx Adipose Subcutaneous (n=385) Gene <sup>†</sup> P-value <sup>‡</sup> | GTEx Whole blood (n=369) Gene <sup>†</sup> P-value <sup>‡</sup> | GTEx Liver (n=153) Gene <sup>†</sup> P-value <sup>‡</sup> | GTEx Artery Aorta (n=267) Gene <sup>†</sup> P-value <sup>‡</sup> | GTEx Testis (n=225) Gene <sup>†</sup> P-value <sup>‡</sup> | GTEx Colon-Transverse (n=246) Gene <sup>†</sup> P-value <sup>‡</sup> | GTEx Brain-Cerebellum (n=154) Gene <sup>†</sup> P-value <sup>‡</sup> |
|----------------------------------------------------------------------------------------------------------|-----|-------------|------------|-------------|--------------------------------------------------------------|------------------------------------------------------------------------------|------------------------------------------------------------------|-------------------------------------------------------------|-------------------------------------------------------------------|----------------------------------------------------------|---------------------------------------------------------------------------|--------------------------------------------------------------------------|-----------------------------------------------------------------|-----------------------------------------------------------|------------------------------------------------------------------|------------------------------------------------------------|----------------------------------------------------------------------|----------------------------------------------------------------------|
| <b>Kegg_Maturity Onset Diabetes of the Young (MODY) and Reactome_Regulation of Beta Cell Development</b> |     |             |            |             |                                                              |                                                                              |                                                                  |                                                             |                                                                   |                                                          |                                                                           |                                                                          |                                                                 |                                                           |                                                                  |                                                            |                                                                      |                                                                      |
| HNF1A                                                                                                    | 12  | rs2244608   | A          | G           | —                                                            | —                                                                            | SPPL3<br>↓<br>1.1E-07                                            | ACADS<br>↑<br>3.8E-07                                       | C12orf43<br>↓<br>2.3E-08                                          | C12orf43<br>↓<br>1.6E-06                                 | MLEC<br>↓<br>1.5E-08                                                      | C12orf43<br>↓<br>1.8E-07                                                 | —                                                               | —                                                         | —                                                                | HNF1A<br>↑<br>3.0E-05                                      | C12orf43<br>↓<br>5.1E-07                                             | —                                                                    |
| HNF4G                                                                                                    | 8   | rs2943547   | A          | G           | —                                                            | HNF4G<br>↑<br>0.05                                                           | No significant eQTLs were found for rs2943547 all eQTL tissues   |                                                             |                                                                   |                                                          |                                                                           |                                                                          |                                                                 |                                                           |                                                                  |                                                            |                                                                      |                                                                      |
| <b>Biocarta_Cardiac EGF pathway</b>                                                                      |     |             |            |             |                                                              |                                                                              |                                                                  |                                                             |                                                                   |                                                          |                                                                           |                                                                          |                                                                 |                                                           |                                                                  |                                                            |                                                                      |                                                                      |
| EDNRA                                                                                                    | 4   | rs35232409  | G          | C           | —                                                            | NA                                                                           | No significant eQTLs were found for rs35232409 all eQTL tissues  |                                                             |                                                                   |                                                          |                                                                           |                                                                          |                                                                 |                                                           |                                                                  |                                                            |                                                                      |                                                                      |
|                                                                                                          |     | rs6537481   | A          | G           | —                                                            | EDNRA<br>↑<br>0.2                                                            | No significant eQTLs were found for rs35232409 all eQTL tissues  |                                                             |                                                                   |                                                          |                                                                           |                                                                          |                                                                 |                                                           |                                                                  |                                                            |                                                                      |                                                                      |
| AGT                                                                                                      | 1   | rs1326889   | C          | T           | —                                                            | AGT<br>↑<br>0.13                                                             | —                                                                | —                                                           | —                                                                 | —                                                        | —                                                                         | AGT<br>↑<br>5.4E-10                                                      | —                                                               | —                                                         | —                                                                | —                                                          | AGT<br>↑<br>3.2E-08                                                  | AGT<br>↓<br>1.4E-11                                                  |
| <b>Nikolsky_breast cancer chr17 amplicon</b>                                                             |     |             |            |             |                                                              |                                                                              |                                                                  |                                                             |                                                                   |                                                          |                                                                           |                                                                          |                                                                 |                                                           |                                                                  |                                                            |                                                                      |                                                                      |
| ERBB2<br>PGAP3<br>TCAP<br>STARD3<br>PNMT                                                                 | 17  | rs876493    | G          | A           | PGAP3<br>↓<br>3.9E-07                                        | PGAP3<br>↓<br>1.16E-05                                                       | PGAP3<br>↓<br>3.2E-08                                            | PGAP3<br>↓<br>1.3E-12                                       | —                                                                 | PGAP3<br>↓<br>3.0E-09                                    | PGAP3<br>↓<br>1.1E-08                                                     | GSDMA<br>↑<br>3.3E-05                                                    | GSDMB<br>↓<br>7.9E-10                                           | PGAP3<br>↓<br>2.1E-07                                     | PGAP3<br>↓<br>2.4E-06                                            | —                                                          | PGAP3<br>↓<br>6.5E-13                                                | —                                                                    |
|                                                                                                          |     | rs3764351   | G          | A           | PGAP3<br>↓<br>6.6E-09                                        | PGAP3<br>↓<br>9.7E-05                                                        | PGAP3<br>↓<br>3.1E-11                                            | PGAP3<br>↓<br>2.0E-18                                       | —                                                                 | PGAP3<br>↓<br>3.3E-11                                    | PGAP3<br>↓<br>1.3E-12                                                     | —                                                                        | —                                                               | PGAP3<br>↓<br>3.3E-07                                     | PGAP3<br>↓<br>1.3E-05                                            | —                                                          | PGAP3<br>↓<br>9.6E-14                                                | —                                                                    |
| GRB7<br>MIEN1                                                                                            | 17  | rs4795393   | C          | T           | PGAP3<br>↓<br>4.0E-10                                        | PGAP3<br>↓<br>3.8E-05                                                        | PGAP3<br>↓<br>6.4E-08                                            | PGAP3<br>↓<br>3.0E-15                                       | —                                                                 | PGAP3<br>↓<br>4.8E-08                                    | PGAP3<br>↓<br>2.5E-10                                                     | GSDMA<br>↑<br>8.6E-07                                                    | GSDMB<br>↓<br>6.8E-10                                           | PGAP3<br>↓<br>5.2E-08                                     | —                                                                | ZBPB2<br>↓<br>3.3E-06                                      | PGAP3<br>↓<br>2.9E-10                                                | —                                                                    |
| GSDMB<br>ZBPB2                                                                                           | 17  | rs12453507  | C          | G           | PGAP3<br>↓<br>2.7E-07                                        | PGAP3<br>↓<br>2.8E-05                                                        | PGAP3<br>↓<br>7.8E-07                                            | PGAP3<br>↓<br>7.4E-12                                       | —                                                                 | PGAP3<br>↓<br>1.1E-06                                    | GSDMB<br>↓<br>8.5E-06                                                     | GSDMA<br>↑<br>4.8E-11                                                    | —                                                               | —                                                         | —                                                                | —                                                          | PGAP3<br>↓<br>3.5E-06                                                | —                                                                    |
| STAC2                                                                                                    | 17  | rs72823344  | G          | A           | —                                                            | STAC2<br>↑<br>0.297                                                          | —                                                                | —                                                           | STAC2<br>↑<br>4.8E-06                                             | —                                                        | STAC2<br>↑<br>7.1E-07                                                     | —                                                                        | —                                                               | —                                                         | —                                                                | —                                                          | —                                                                    | —                                                                    |
| THRA<br>MED24                                                                                            | 17  | rs113520394 | C          | T           | MED24<br>↑<br>2.2E-06                                        | MED24<br>↓<br>0.110                                                          | MED24<br>↑<br>1.9E-08                                            | MED24<br>↑<br>1.4E-10                                       | MED24<br>↑<br>6.9E-09                                             | —                                                        | —                                                                         | MED24<br>↑<br>1.0E-05                                                    | —                                                               | —                                                         | —                                                                | —                                                          | —                                                                    | MED24<br>↑<br>3.1E-05                                                |

|                        |    |            |   |   |                          |                       |                                    |                          |                          |                          |                          |                          |                         |                          |                          |                               |                          |                        |
|------------------------|----|------------|---|---|--------------------------|-----------------------|------------------------------------|--------------------------|--------------------------|--------------------------|--------------------------|--------------------------|-------------------------|--------------------------|--------------------------|-------------------------------|--------------------------|------------------------|
| TMEM98                 | 17 | rs2470201  | G | A | —                        | TMEM98<br>↓<br>0.612  | TMEM98<br>↓<br>3.8E-05             | TMEM98<br>↓<br>2.4E-05   | TMEM98<br>↓<br>2.7E-13   | —                        | TMEM98<br>↓<br>1.9E-08   | —                        | —                       | —                        | —                        | TMEM98<br>↓<br>8.5E-07        | —                        | TMEM98<br>↓<br>3.9E-06 |
| Pujana ATM PCC Network |    |            |   |   |                          |                       |                                    |                          |                          |                          |                          |                          |                         |                          |                          |                               |                          |                        |
| SMC2                   | 9  | rs7859034  | G | T | —                        | SMC2<br>↑<br>0.097    | SMC2<br>↓<br>6.9E-06               | SMC2<br>↓<br>4.7E-52     | SMC2<br>↓<br>5.0E-14     | SMC2<br>↓<br>7.6E-06     | SMC2<br>↓<br>3.2E-10     | —                        | —                       | —                        | SMC2<br>↓<br>9.2E-07     | —                             | —                        | SMC2<br>↓<br>4.2E-37   |
| HNF1A                  | 12 | rs1169297  | G | A | —                        | HNF1A<br>↑<br>0.462   | No significant eQTLs for rs1169297 |                          |                          |                          |                          |                          |                         |                          |                          |                               |                          |                        |
|                        |    | rs1169291  | C | T | —                        | HNF1A<br>↑<br>0.470   | No significant eQTLs for rs1169291 |                          |                          |                          |                          |                          |                         |                          |                          |                               |                          |                        |
| CASP7                  | 10 | rs3124737  | A | G | CASP7<br>↑<br>2.5E-08    | CASP7<br>↑<br>0.02    | CASP7<br>↑<br>4.5E-08              | CASP7<br>↑<br>9.4E-10    | CASP7<br>↑<br>5.4E-12    | CASP7<br>↑<br>1.4E-06    | CASP7<br>↑<br>1.1E-07    | CASP7<br>↑<br>1.5E-07    | CASP7<br>↑<br>1.0E-10   | —                        | CASP7<br>↑<br>4.2E-05    | RP11-211N11.5<br>↑<br>1.2E-09 | —                        | —                      |
| FAM53B                 | 10 | rs34501420 | G | C | —                        | FAM53B<br>↓<br>0.230  | METTL10<br>↓<br>5.6E-06            | METTL10<br>↓<br>9.5E-11  | METTL10<br>↓<br>1.3E-09  | METTL10<br>↓<br>5.7E-11  | METTL10<br>↓<br>8.9E-11  | METTL10<br>↓<br>8.6E-16  | —                       | METTL10<br>↓<br>3.5E-07  | METTL10<br>↓<br>3.8E-06  | METTL10<br>↓<br>2.3E-05       | METTL10<br>↓<br>4.1E-09  | —                      |
| OIP5                   | 15 | rs11852609 | T | G | OIP5-AS1<br>↑<br>1.8E-16 | OIP5<br>↑<br>0.233    | OIP5-AS1<br>↑<br>3.9E-05           | OIP5-AS1<br>↑<br>1.2E-34 | OIP5-AS1<br>↑<br>6.1E-42 | OIP5-AS1<br>↑<br>2.8E-23 | OIP5-AS1<br>↑<br>1.1E-31 | OIP5-AS1<br>↑<br>6.4E-32 | NDUFAF1<br>↑<br>1.7E-05 | OIP5-AS1<br>↑<br>5.5E-06 | OIP5-AS1<br>↑<br>2.3E-17 | OIP5-AS1<br>↑<br>2.2E-14      | OIP5-AS1<br>↑<br>7.4E-17 | —                      |
| HNRNPAB                | 5  | rs12522289 | A | G | —                        | HNRNPAB<br>↓<br>0.053 | —                                  | —                        | —                        | —                        | HNRNPAB<br>↓<br>1.1E-07  | —                        | —                       | —                        | —                        | —                             | HNRNPAB<br>↓<br>1.1E-17  | —                      |
|                        |    | rs3749812  | T | C | —                        | HNRNPAB<br>↓<br>0.069 | —                                  | —                        | —                        | —                        | —                        | —                        | —                       | —                        | —                        | RP11-281O15.2<br>↓<br>5.8E-06 | HNRNPAB<br>↓<br>4.4E-11  | —                      |
| ANGEL1                 | 5  | rs8008960  | G | A | —                        | ANGEL1<br>↑<br>0.016  | —                                  | —                        | —                        | —                        | —                        | —                        | —                       | —                        | ANGEL1<br>↓<br>9.2E-06   | C14orf166B<br>↓<br>1.3E-11    | —                        | —                      |

\*Independent replication and tissue specificity for eQTL analysis was carried out using the Genotype-Tissue Expression project (GTEx) and normal pancreas from the LTG. Major allele is Ref (reference) allele. eQTL, Expression Qualitative Trait Loci; SNP, single nucleotide polymorphism; PCC, Pearson correlation coefficient; LTG, Laboratory of Translational Genomics; TSS, transcription start site.

† The direction of influence of the risk SNP on gene mRNA levels is depicted as: ↑ = increased mRNA level or positive influence; ↓ = decreased mRNA levels or negative influence; em-dash (—) = no data available.

‡ eQTL at FDR ( $\leq 0.05$ ) using  $\pm 1$  Mb *cis*-window around TSS. Statistical test was two-sided.

**Supplementary Table 8. Potential regulatory function of the top PDAC-associated and eQTLs SNP identified through gene set and pathway analysis**

| Gene                                                                                                      | Chr | Top SNP*   | Risk Allele | OR†  | 95% CI Lower | 95% CI Upper | SNP P-value‡ | Other coding annotation | RegulomeDB score | Regulatory function§                                                                                                                                                                                                                                                         | SNPs in LD                                                                                                                                                                     |
|-----------------------------------------------------------------------------------------------------------|-----|------------|-------------|------|--------------|--------------|--------------|-------------------------|------------------|------------------------------------------------------------------------------------------------------------------------------------------------------------------------------------------------------------------------------------------------------------------------------|--------------------------------------------------------------------------------------------------------------------------------------------------------------------------------|
| <b>Kegg Maturity Onset Diabetes of the Young (MODY) and Reactome_ Regulation of Beta Cell Development</b> |     |            |             |      |              |              |              |                         |                  |                                                                                                                                                                                                                                                                              |                                                                                                                                                                                |
| HNF1A                                                                                                     | 12  | rs2244608  | G           | 1.11 | 1.07         | 1.16         | 1.54E-06     | HNF1A-AS1               | 2b               | Potential eQTL SNP in multiple tissues. Located in active TSS in pancreas and pancreatic islet cells. Changes binding motif for ERalpha, ESR2, HNF4, RAR. Locates to a strong H3K27 acetylation enhancer mark and H3K4m3 promoter marks in pancreas islets and normal tissue | rs1169288 (r <sup>2</sup> =0.96) which results in a missense in HNF1A.                                                                                                         |
| HNF4G                                                                                                     | 8   | rs2943547  | G           | 1.09 | 1.05         | 1.14         | 2.31E-05     | Intronic variant HNF4G  | 6                | No significant eQTLs were found for SNP rs2943547 in all GTEx eQTL Tissues, but weak positive eQTL for HNF4G (P=0.052) in LTG normal pancreas dataset. Chromatin enhancer state in fetal intestine.                                                                          | —                                                                                                                                                                              |
| <b>Biocarta_Cardiac EGF Pathway</b>                                                                       |     |            |             |      |              |              |              |                         |                  |                                                                                                                                                                                                                                                                              |                                                                                                                                                                                |
| EDNRA                                                                                                     | 4   | rs35232409 | C           | 0.88 | 0.84         | 0.93         | 3.19E-07     | 5.8kb 5' of EDNRA       | 6                | No data as eQTL. Quiescent/Low chromatin state in pancreas.                                                                                                                                                                                                                  | rs4835083 (r <sup>2</sup> > 0.7) within intron 1 EDNRA. Flanking active TSS in normal pancreas with H3K4me1 and H3K27ac enhancer and H3K4me3 promotor marks in normal pancreas |
|                                                                                                           |     | rs6537481  | G           | 0.88 | 0.83         | 0.92         | 1.14E-07     | 5.8kb 5' of EDNRA       | 6                | No data as eQTL. Quiescent/Low chromatin state in pancreas.                                                                                                                                                                                                                  | —                                                                                                                                                                              |
| AGT                                                                                                       | 1   | rs1326889  | T           | 0.90 | 0.86         | 0.94         | 4.21E-07     | RP11-99J16__A.2         | 5                | Potential eQTL SNP in multiple tissues. Weak transcription and enhancer chromatin state in pancreas islets and liver cells, respectively. In LD with SNP rs699 resulting in missense mutation in AGT;                                                                        | Rs699 r <sup>2</sup> =0.7 which is a missense variant (M268T) in AGT                                                                                                           |

|                                          |    |            |   |      |      |      |          |                   |         |                                                                                                                                                                                                                                                                                                                                       |                                                               |
|------------------------------------------|----|------------|---|------|------|------|----------|-------------------|---------|---------------------------------------------------------------------------------------------------------------------------------------------------------------------------------------------------------------------------------------------------------------------------------------------------------------------------------------|---------------------------------------------------------------|
|                                          |    |            |   |      |      |      |          |                   |         | strong enhancer in liver and brain and within a Dnase I site in liver                                                                                                                                                                                                                                                                 |                                                               |
| Nikolsky_breast cancer chr17 amplicon    |    |            |   |      |      |      |          |                   |         |                                                                                                                                                                                                                                                                                                                                       |                                                               |
| ERBB2<br>PGAP3<br>TCAP<br>STARD3<br>PNMT | 17 | rs876493   | A | 0.90 | 0.86 | 0.94 | 1.27E-06 | 5'UTR PNMT        | 4       | Potential multi-tissue eQTL (34 hits) SNP reduced PGAP3 mRNA in pancreas tissue. Located in active TSS promoter in pancreas islets and enhancer region in pancreas. Promoter histone marks in 18 tissues, chromatin enhancer state in normal pancreas (and 9 tissues).                                                                | All SNPs rs876493, rs3764351, rs4795393 and rs12453507 in LD. |
|                                          |    | rs3764351  | A | 0.91 | 0.87 | 0.95 | 1.27E-05 | PNMT              | 2b      | Potential Eqtl (GTEx) PGAP3 in multiple tissues including pancreas and replicated as PGAP3 eQTL in normal pancreas in independent dataset. SNP likely to affect binding. Enhancer chromatin state in pancreas and located in active TSS in pancreatic islet cells. Locates to CpG island and strong DNase I site in ENCODE cell lines | Rs1877031 (r2=0.9176) results in missense mutation            |
| GRB7<br>MIEN1                            | 17 | rs4795393  | T | 0.94 | 0.90 | 0.98 | 0.002    | 695bp 5' of GRB7  | 5       | Potential eQTL (GTEx) PGAP3 in multiple tissues including pancreas and replicated as PGAP3 eQTL in normal pancreas in independent dataset. Enhancer chromatin state in pancreas                                                                                                                                                       | —                                                             |
| GSDMB<br>ZBPB2                           | 17 | rs12453507 | G | 0.94 | 0.90 | 0.98 | 0.004    | 7.6kb 3' of GSDMB | no data | Potential eQTL (GTEx) PGAP3 in multiple tissues including pancreas and replicated as PGAP3 eQTL in normal pancreas in independent dataset. No data available on chromatin state in any tissue                                                                                                                                         | —                                                             |
| Pujana ATM PCC network                   |    |            |   |      |      |      |          |                   |         |                                                                                                                                                                                                                                                                                                                                       |                                                               |
| STAC2                                    | 17 | rs72823344 | A | 1.18 | 1.08 | 1.29 | 1.91E-04 | Intronic CACNB1   | 5       | Potential eQTL in artery tibial (GTEx). Located in a weak transcripton site                                                                                                                                                                                                                                                           | —                                                             |

|        |    |            |   |      |      |      |          |                    |   |                                                                                                                                                                                                                 |                                                                                                                                                                                       |
|--------|----|------------|---|------|------|------|----------|--------------------|---|-----------------------------------------------------------------------------------------------------------------------------------------------------------------------------------------------------------------|---------------------------------------------------------------------------------------------------------------------------------------------------------------------------------------|
|        |    |            |   |      |      |      |          |                    |   | (promotor) in pancreas                                                                                                                                                                                          |                                                                                                                                                                                       |
| CASP7  | 10 | rs3124737  | G | 0.91 | 0.88 | 0.95 | 3.29E-05 | 6.4 kb of 3' CASP7 | 6 | Potential eQTL SNP in pancreas (LTG dataset) and multiple tissues (GTEx). Enhancer histone markers in lung, GI cells. Changes BRCA1, Pbx-1, Sox motifs.                                                         | —                                                                                                                                                                                     |
| FAM53B | 10 | rs34501420 | C | 1.09 | 1.04 | 1.14 | 5.15E-04 | LHPP               | 4 | Potential eQTL SNP in multiple tissues. Enhancer histone markers and DNase I in 6 tissues.                                                                                                                      | —                                                                                                                                                                                     |
| OIP5   | 15 | rs11852609 | G | 1.08 | 1.03 | 1.12 | 0.001    | OIP5-AS1           | 5 | Potential eQTL SNP in multiple tissues. Weak transcription site in pancreas and islet cells. Strong transcription site in liver. Enhancer region in HSC B-cells.                                                | —                                                                                                                                                                                     |
| SMC2   | 9  | rs7859034  | T | 0.90 | 0.86 | 0.93 | 3.07E-07 | Intronic SMC2      | 7 | GTEx eQTL SNP in multiple tissues (n=34) (non-pancreas). Regulatory motifs altered CIX, ZBTB33_disc3.                                                                                                           | SNP in LD (r2=0.90) with rs3818626 located in the 5' UTR of SMC2. Rs3818626 has potential to affect binding as is in CpG island and an active TSS in normal pancreas and islet cells. |
| HNF1A  | 12 | rs1169291  | T | 1.11 | 1.06 | 1.16 | 8.39E-06 | Intronic HNF1A     | 6 | GTEx eQTL SNP in multiple tissues. Weak transcription in pancreas and islet cells. Strong transdcription site for Liver and digestive tissues (GI). Regulatory motifs altered EGR-1, PBX-1, RREB-1 VDR-2 ZFP281 | —                                                                                                                                                                                     |
|        |    | rs1169297  | A | 1.10 | 1.05 | 1.15 | 1.40E-05 | Intronic HNF1A     | 5 | GTEx eQTL in multiple tissues. Locates to weak transcription in pancreas and islet cells. Strong transcription and enhancer in HepG liver cells.                                                                | —                                                                                                                                                                                     |
| HNF1B  | 17 | rs12951345 | C | 0.88 | 0.84 | 0.93 | 1.38E-06 | Intronic HNF1B     | 4 | No eQTL data. Primary H3K27ac possible Enhancer in pancreas and islet cells.                                                                                                                                    | —                                                                                                                                                                                     |

\* SNPs in the top ranked PDAC associated gene sets and pathways. The association evidence from the strongest SNP(s) (up to the two) in a gene were accumulated. The sARTP method adjusts for the size of genes (i.e., number of SNPs in a gene) and the size of pathways (i.e., number of genes in a pathway) through a resampling procedure. PDAC, pancreatic ductal adenocarcinoma; SNP, single nucleotide polymorphism; Chr, chromosome; OR, Odds Ratio; CI, confidence interval; eQTL, expression quantitative trait loci; GTEx, the Genotype-Tissue Expression project.

†Major allele is Ref (reference) allele.

‡ SNP P-values were calculated using the two-sided Wald's test. P-values and OR are shown in order of lowest P-value for PDAC in the combined PanScan 1, 2, 3 and PanC4.

§The potential regulatory function of the SNP of interest were evaluated using experimental data in the UCSC Genome browser (<http://genome.ucsc.edu>) using Roadmap and ENCODE data for pancreas and islet tissues. Data included chromatin tracks (DNaseI sites, histone modification [or regulatory regions designated using a Hidden Markov Model (HMM)] (Core 15-state model (5 marks, 127 epigenomes), transcription factor binding to DNA, CpG island sites. Protein coding and non-coding annotation for the location (Hg19) of each SNP using the UCSC browser and Ensembl. DNA binding motifs and individual histone marks were also identified and validated using HaploregV4.1 (<http://archive.broadinstitute.org/mammals/haploreg/haploreg.php>) and RegulomeDB (<http://www.regulomedb.org/>).



## **Supplementary Information:**

### **Notes**

The IARC/Central Europe study was supported by a grant from the US National Cancer Institute at the National Institutes of Health (R03 CA123546-02) and grants from the Ministry of Health of the Czech Republic (NR 9029-4/2006, NR9422-3, NR9998-3, MH CZ-DRO-MMCI 00209805).

The work at Johns Hopkins University was supported by the NCI Grants P50CA062924 and R01CA97075. Additional support was provided by the Lustgarten Foundation, Susan Wojcicki and Dennis Troper and the Sol Goldman Pancreas Cancer Research Center. This work was supported by RO1 CA154823 and federal funds from the National Cancer Institute (NCI), US National Institutes of Health (NIH) under contract number HHSN261200800001E.

The Mayo Clinic Biospecimen Resource for Pancreas Research study is supported by the Mayo Clinic SPORE in Pancreatic Cancer (P50 CA102701).

The Memorial Sloan Kettering Cancer Center Pancreatic Tumor Registry is supported by P30CA008748, the Geoffrey Beene Foundation, the Arnold and Arlene Goldstein Family Foundation, and the Society of MSKCC.

The PACIFIC Study was supported by RO1CA102765, Kaiser Permanente and Group Health Cooperative.

The Queensland Pancreatic Cancer Study was supported by a grant from the National Health and Medical Research Council of Australia (NHMRC) (Grant number 442302). RE Neale is supported by a NHMRC Senior Research Fellowship (#1060183).

The UCSF pancreas study was supported by NIH-NCI grants (R01CA1009767, R01CA109767-S1 and R0CA059706) and the Joan Rombauer Pancreatic Cancer Fund. Collection of cancer incidence data was supported by the California Department of Public Health as part of the statewide cancer reporting program; the NCI's SEER Program under contract HSN261201000140C awarded to CPIC; and the CDC's National Program of Cancer Registries, under agreement #U58DP003862-01 awarded to the California Department of Public Health.

The Yale (CT) pancreas cancer study is supported by National Cancer Institute at the U.S. National Institutes of Health, grant 5R01CA098870. The cooperation of 30 Connecticut hospitals, including Stamford Hospital, in allowing patient access, is gratefully acknowledged. The Connecticut Pancreas Cancer Study was approved by the State of Connecticut Department of Public Health Human Investigation Committee. Certain data used in that study were obtained from the Connecticut Tumor Registry in the Connecticut Department of Public Health. The authors assume full responsibility for analyses and interpretation of these data.

Studies included in PANDoRA were partly funded by: the Czech Science Foundation (No. P301/12/1734), the Internal Grant Agency of the Czech Ministry of Health (IGA

NT 13 263); the Baden-Württemberg State Ministry of Research, Science and Arts (Prof. H. Brenner), the Heidelberger EPZ-Pancobank (Prof. M.W. Büchler and team: Prof. T. Hackert, Dr. N. A. Giese, Dr. Ch. Tjaden, E. Soyka, M. Meinhardt; Heidelberger Stiftung Chirurgie and BMBF grant 01GS08114), the BMBH (Prof. P. Schirmacher; BMBF grant 01EY1101), the “5x1000” voluntary contribution of the Italian Government, the Italian Ministry of Health (RC1203GA57, RC1303GA53, RC1303GA54, RC1303GA50), the Italian Association for Research on Cancer (Prof. A. Scarpa; AIRC n. 12182), the Italian Ministry of Research (Prof. A. Scarpa; FIRB - RBAP10AHJB), the Italian FIMP-Ministry of Health (Prof. A. Scarpa; 12 CUP\_J33G13000210001), and by the National Institute for Health Research Liverpool Pancreas Biomedical Research Unit, UK. We would like to acknowledge the contribution of Dr Frederike Dijk and Prof. Oliver Busch (Academic Medical Center, Amsterdam, the Netherlands).

Assistance with genotype data quality control was provided by Cecelia Laurie and Cathy Laurie at University of Washington Genetic Analysis Center

The American Cancer Society (ACS) funds the creation, maintenance, and updating of the Cancer Prevention Study II cohort.

Cancer incidence data for CLUE were provided by the Maryland Cancer Registry, Center for Cancer Surveillance and Control, Department of Health and Mental Hygiene, 201 W. Preston Street, Room 400, Baltimore, MD 21201, <http://phpa.dhmh.maryland.gov/cancer>, 410-767-4055.

We acknowledge the State of Maryland, the Maryland Cigarette Restitution Fund, and the National Program of Cancer Registries of the Centers for Disease Control and Prevention for the funds that support the collection and availability of the cancer registry data.” We thank all the CLUE participants.

The Melbourne Collaborative Cohort Study (MCCS) recruitment was funded by VicHealth and Cancer Council Victoria. The MCCS was further supported by Australian NHMRC grants 209057 and 396414 and by infrastructure provided by Cancer Council Victoria. Cases and their vital status were ascertained through the Victorian Cancer Registry and the Australian Institute of Health and Welfare, including the National Death Index and the Australian Cancer Database.

The NYU study (AZJ and AAA) was funded by NIH R01 CA098661, UM1 CA182934 and center grants P30 CA016087 and P30 ES000260.

The PANKRAS II Study in Spain was supported by research grants from Instituto de Salud Carlos III-FEDER, Spain: Fondo de Investigaciones Sanitarias (FIS) ((#PI95/0017, #PI12/00815, #PI13/00082 and #PI15/01573), Red Temática de Investigación Cooperativa en Cáncer (#RD12/0036/0050), and CIBER de Epidemiología (CIBERESP); Ministerio de Ciencia y Tecnología (CICYT SAF 2000-0097); Generalitat de Catalunya (CIRIT - SGR), Spain.

The Physicians' Health Study was supported by research grants CA-097193, CA-34944, CA-40360, HL-26490, and HL-34595 from the National Institutes of Health, Bethesda, MD USA.

The Women's Health Study was supported by research grants CA-047988, HL-043851, HL-080467, and HL-099355 from the National Institutes of Health, Bethesda, MD USA.

Health Professionals Follow-up Study is supported by NIH grant UM1 CA167552. from the National Cancer Institute, Bethesda, MD USA

Nurses' Health Study is supported by NIH grants UM1 CA186107, P01 CA87969, and R01 CA49449 from the National Cancer Institute, Bethesda, MD USA

Additional support from the Hale Center for Pancreatic Cancer Research, U01 CA21017 from the National Cancer Institute, Bethesda, MD USA , and the United States Department of Defense CA130288, Lustgarten Foundation, Pancreatic Cancer Action Network, Noble Effort Fund, Peter R. Leavitt Family Fund, Wexler Family Fund, and Promises for Purple to B.M. Wolpin.

The WHI program is funded by the National Heart, Lung, and Blood Institute, National Institutes of Health, U.S. Department of Health and Human Services through contracts HHSN268201600018C, HHSN268201600001C, HHSN268201600002C, HHSN268201600003C, and HHSN268201600004C. The authors thank the WHI investigators and staff for their dedication, and the study participants for making the program possible. A full listing of WHI investigators can be found at: <http://www.whi.org/researchers/Documents%20%20Write%20a%20Paper/WHI%20Investigator%20Long%20List.pdf>.

We thank Laurie Burdett, Aurelie Vogt, Belynda Hicks, Amy Hutchinson, Meredith Yeager and other staff at the National Cancer Institute's Division of Epidemiology and Genetics (DECG) Cancer Genomics Research Laboratory (CGR) for GWAS genotyping. We also thank Bao Tran, Jyoti Shetty and other members of the NCI Center for Cancer Research (CCR) Sequencing Facility for sequencing RNA from histologically normal pancreatic tissue samples (LTG samples).

This study utilized the high-performance computational capabilities of the Biowulf Linux cluster at the NIH, Bethesda, MD, USA (<http://biowulf.nih.gov>).

The Genotype-Tissue Expression (GTEx) Project was supported by the Common Fund of the Office of the Director of the National Institutes of Health, and by NCI, NHGRI, NHLBI, NIDA, NIMH, and NINDS. The data used for the analyses described in this manuscript were obtained from the pancreatic tissue data from the GTEx Portal v7 on 09/18/17.

The results published here are in part based upon data generated by The Cancer Genome Atlas (TCGA) managed by the NCI and NHGRI. Information about TCGA can be found at <http://cancergenome.nih.gov/>. We acknowledge the clinical contributors that provided PDAC samples and the data producers of RNAseq and GWAS genotype data from TCGA Research Network. The dataset used for the analyses described in this manuscript was obtained by formal permission through the TCGA Data Access Committee (DAC).
